# Supplementary material for: miR396-OsGRFs Module Balances Growth and Rice Blast Disease-Resistance
Source: Front Plant Sci. 2019 Jan 14;9:1999. doi: 10.3389/fpls.2018.01999 (PMC6339958; doi:10.3389/fpls.2018.01999)
Supplement: Table S1 — Agronomic performances of miR396 over expression lines. [file Table_1.XLSX]

## Sheet: Sheet1
Supplemental Table 1. Agronomic performances of miR396 over expression lines.
Location		PH (cm)	NT	NP	PL (cm)	NGP	SSR (%)	SL(mm)	SW(mm)	SWT (g)
Field 1	NPB	106.36±3.2	8.80±1.92	8.60±1.14	20.58±0.73	138.60±6.39	90.96±1.85	7.32±0.08	3.46±0.05	26.60±0.13
	OE396a	94.60±4.22	7.40±2.70	7.60±3.91	20.10±0.73	135.60±6.84	90.56±1.67	7.02±0.08	3.42±0.08	26.55±0.05
	OE396d	88.40±3.51	11.00±3.32	11.80±2.49	19.87±0.48	131.20±13.79	88.23±1.74	7.04±0.05	3.08±0.08	25.25±0.13
	OE396h	91.44±3.11	13.80±2.95	13.60±3.05	20.16±0.62	139.00±13.82	88.95±2.09	7.10±0.07	3.22±0.08	25.65±0.15
Field 2	NPB	79.40±3.44	6.00±1.00	6.00±1.00	17.70±1.07	115.80±9.07	91.58±2.07	7.32±0.10	3.46±0.06	26.33±0.29
	OE396c	62.00±6.56	4.67±1.08	4.67±1.08	15.30±0.32	78.80±15.27	86.78±2.18	7.02±0.10	3.12±0.10	22.50±0.50
PH, plant height. NT, number of tillers. NP, number of panicles. PL, panicle length. NGP, number of grains per panicle. SSR, seed setting rate. SL, seed length. SW, seed width. SWT, 1,000-seed weight. Values are all shown as means ± s.e.m
